# Supplementary material
Source: HighWire-hosted journal article supplement (https://www.canjsurg.ca/highwire/filestream/96785/field_highwire_adjunct_files/1/54-1-25-app2.pdf)
Supplement: 54-1-25-app2.pdf [file 54-1-25-app2.pdf]

**Appendix 2 to: Zahrai A, Chahal J, Stojimirovic D, et al. Quality of life and educational benefit among orthopedic surgery residents : a prospective, multicentre comparison of the night float and the standard call systems. *Can J Surg* 2011;54:25-32.**

## **Appendix 2: Stress Level**

Please rate stress experienced over the last two months by circling **ONE** of following:

- 0= little or no stress
- 1= minimal stress
- 2= moderate stress
- 3= high stress
- 4= excessive stress

|                                                             |          |          |          |          |          |
|-------------------------------------------------------------|----------|----------|----------|----------|----------|
| <b>Overall stress</b>                                       | <b>0</b> | <b>1</b> | <b>2</b> | <b>3</b> | <b>4</b> |
| <b>Stress of being a resident</b>                           | <b>0</b> | <b>1</b> | <b>2</b> | <b>3</b> | <b>4</b> |
| <b>Stress of combining a personal and professional life</b> | <b>0</b> | <b>1</b> | <b>2</b> | <b>3</b> | <b>4</b> |
